# Supplementary material
Source: PubMed Central journal article supplement (PMC2219544)

# Novelty P3 Amplitude (Mean +/- SEM)

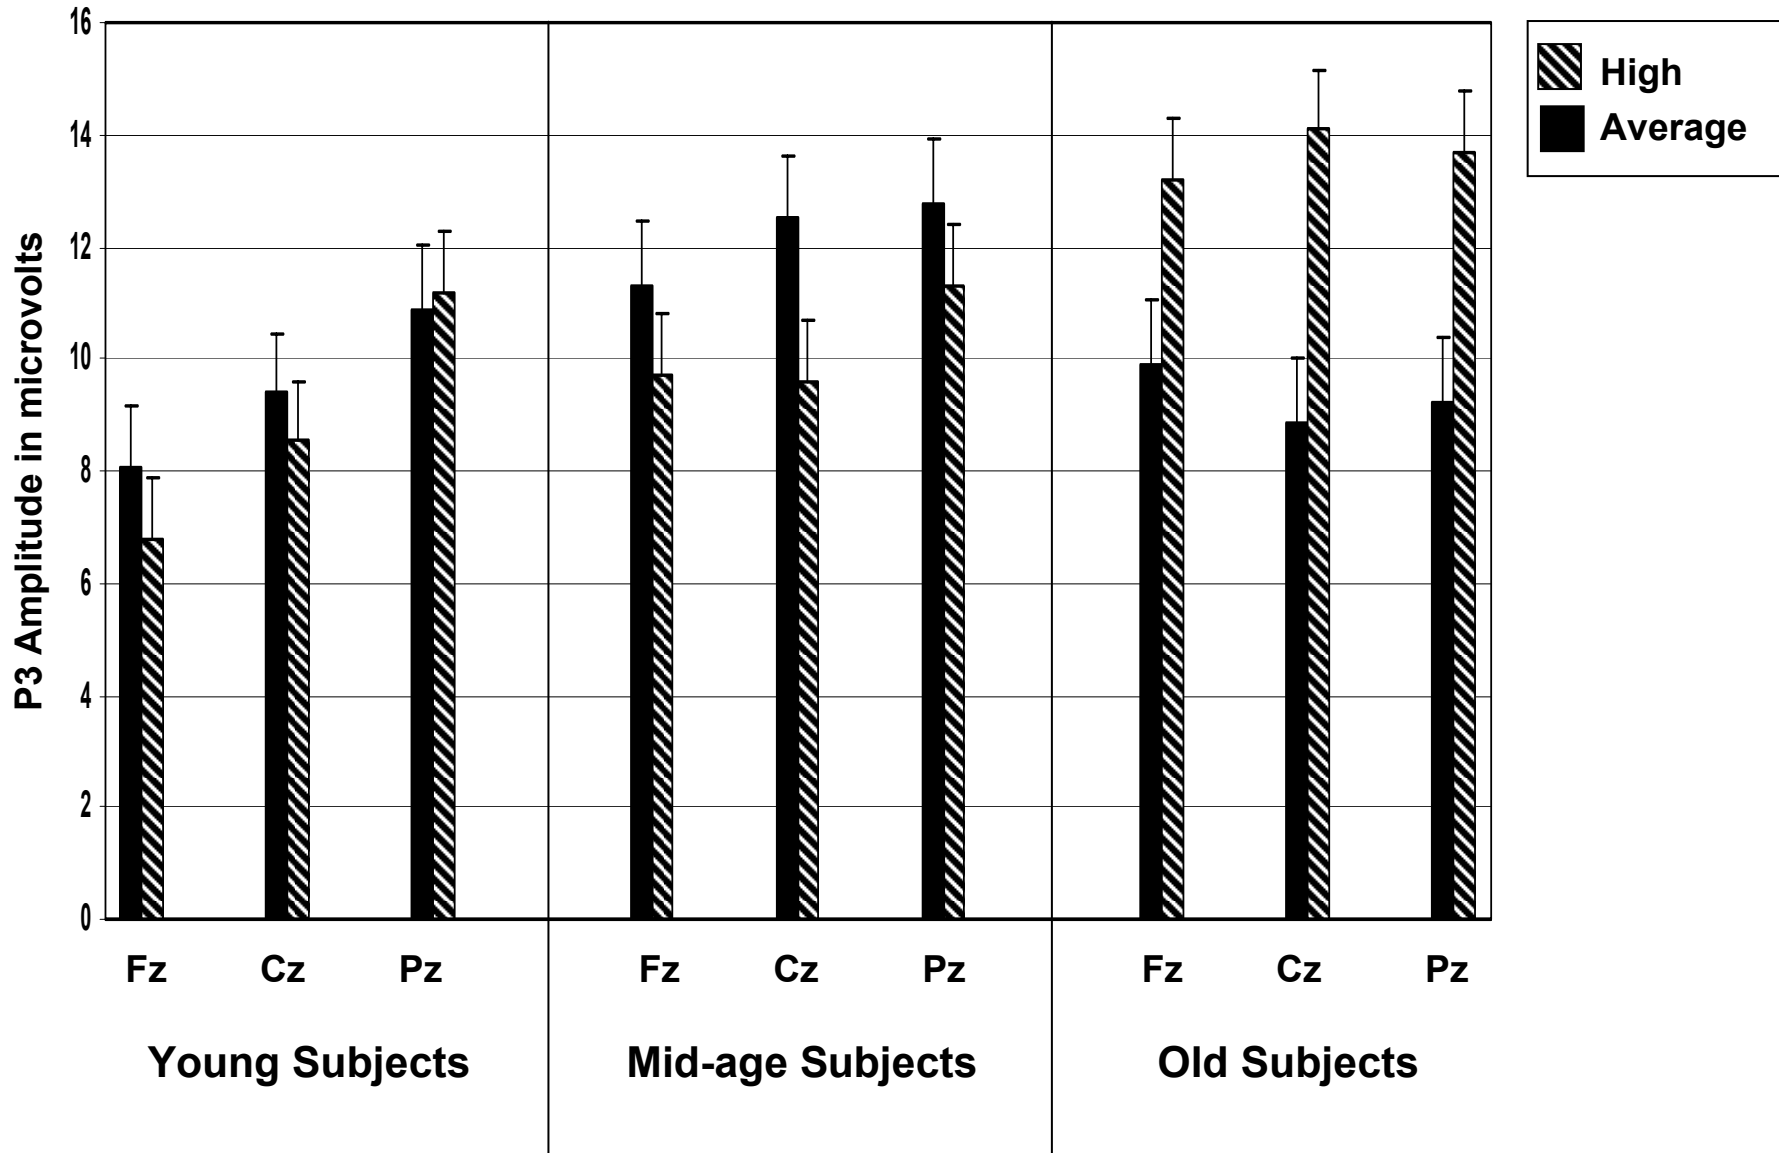

Supplement: NIHMS35207-supplement-03.pdf [file NIHMS35207-supplement-03.pdf]

A)

## Novelty P3 Difference Wave

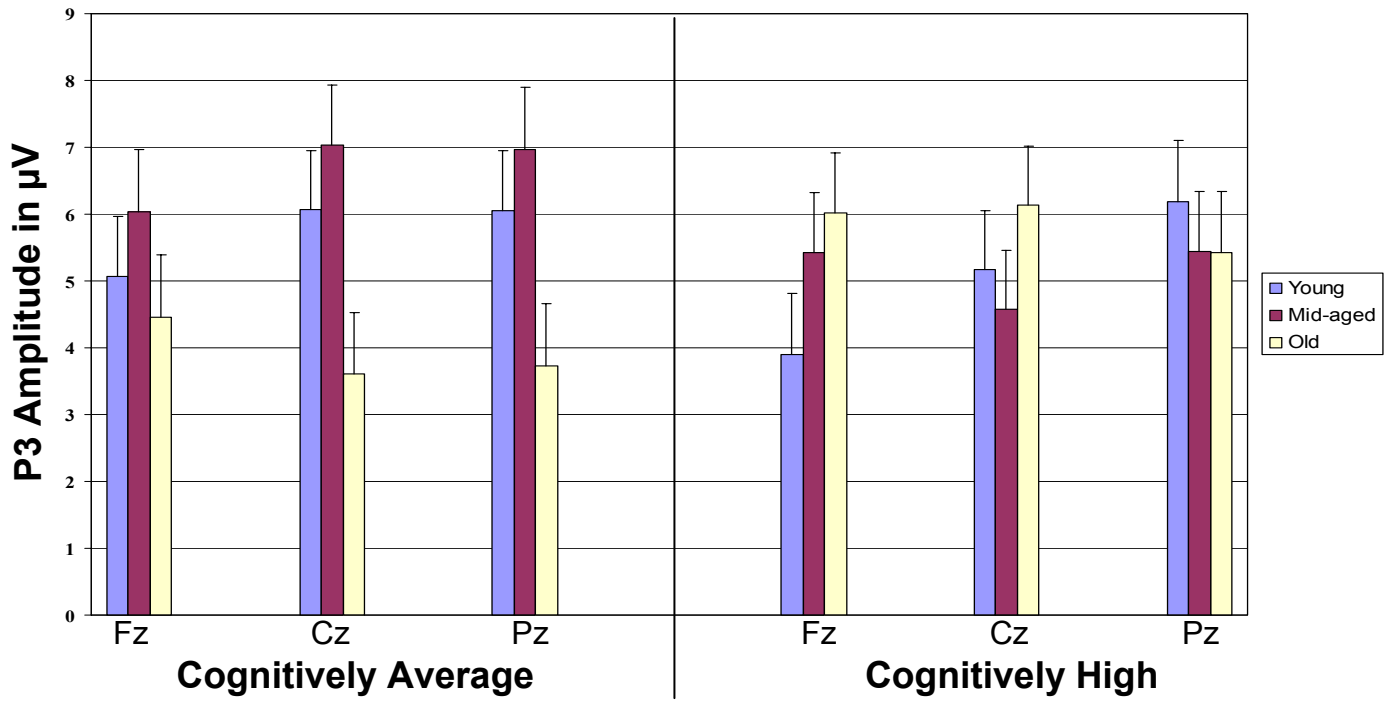

B)

## Target P3 Difference Wave

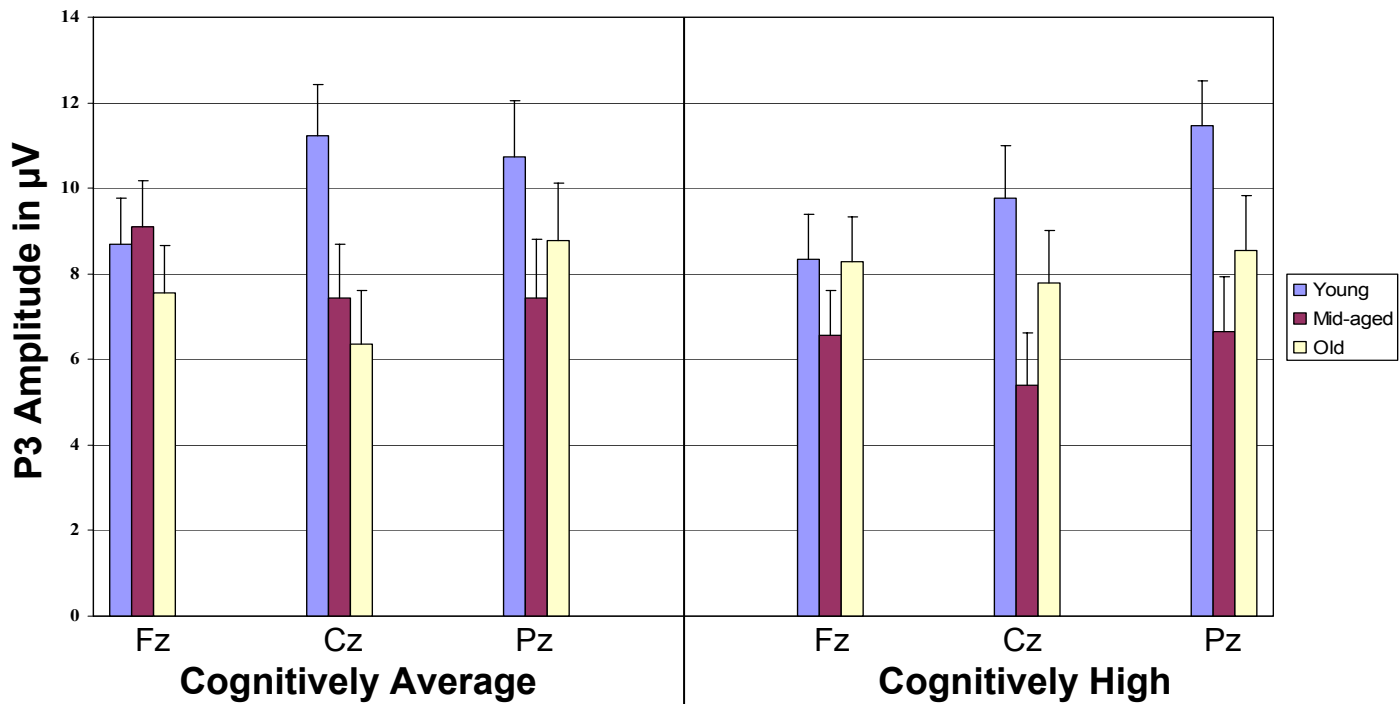

Supplement: NIHMS35207-supplement-05.pdf [file NIHMS35207-supplement-05.pdf]
